# Supplementary material
Source: PubMed Central journal article supplement (PMC6444050)
Supplement: NIHMS889079-supplement-S1.pdf [file NIHMS889079-supplement-S1.pdf]

**Table S1.** Angiographic characteristics and procedure related data in patients with PCI subdivided into statin pretreatment or naïve before PCI procedures

|                                       | Statin naïve (n=58) | Statin pretreated (n=80) |
|---------------------------------------|---------------------|--------------------------|
| <b>Number of diseased CAD</b>         |                     |                          |
| One vessel disease                    | 26 (44.8)           | 36 (45)                  |
| Two vessel disease                    | 21 (36.2)           | 29 (36.2)                |
| Triple vessel disease                 | 11 (18.9)           | 15 (18.7)                |
| Procedure time                        | 46.2±13.6           | 46.1±12.6                |
| <b>Minimal lumen diameter (mm)</b>    |                     |                          |
| Before intervention                   | 0.65±0.12           | 0.66±0.11                |
| After intervention                    | 2.67±0.66           | 2.63±0.58                |
| Lumen gain (mm)                       | 2.12±0.62           | 2.13±0.52                |
| <b>Diameter stenosis (%)</b>          |                     |                          |
| Before intervention                   | 77.3±5.8            | 78.3±6.6                 |
| After intervention                    | 4.5±1.2             | 4.4±2.1                  |
| <b>Lesion of CAD</b>                  |                     |                          |
| Right coronary artery                 | 19 (32.7)           | 26 (32.5)                |
| Left anterior descending artery       | 18 (31)             | 26 (32.5)                |
| Left circumflex artery                | 21 (37.9)           | 28 (35)                  |
| <b>Mean morphological measurement</b> |                     |                          |
| Length (mm)                           | 18.4±4.2            | 18.3±5.2                 |
| Balloon/stent artery ratio            | 1.07±0.45           | 1.08±0.35                |
| Nominal largest balloon size (mm)     | 3.45±0.66           | 3.44±0.68                |

|                          |          |          |
|--------------------------|----------|----------|
| Maximal pressure (kPa)   | 14.3±5.2 | 14.4±6.1 |
| Total inflation time (s) | 167±22   | 165±32   |

---

Values are expressed as mean±SD or number (%). CAD = coronary artery disease; PCI = percutaneous coronary intervention. All P values are >0.05.
